# Supplementary material for: Synthesis of high-entropy oxides derived from metal–organic frameworks and their catalytic performance for total toluene oxidation
Source: Royal Society of Chemistry journal article supplement (doi:10.1039/d4nj02650k), 2024-01-01
Supplement: d4nj02650k1.pdf [file d4nj02650k1.pdf]

## Supplementary Information

### Synthesis of high entropy oxides derived from metal organic frame and catalytic performance for total toluene oxidation

Abid Hussain<sup>a, b</sup>, Yuhua Zheng<sup>a\*</sup>, Qianyu Wang<sup>a, c</sup>, Yanbin Cui<sup>a, b\*</sup>

<sup>a</sup> State Key Laboratory of Mesoscience and Engineering, Institute of Process Engineering, Chinese Academy of Sciences, Beijing 100190, China.

<sup>b</sup> Center of Materials Science and Optoelectronics Engineering, University of Chinese Academy of Sciences, Beijing 100049, China.

<sup>c</sup> State Key Laboratory of Heavy Oil Processing, China University of Petroleum, Beijing 102249, China.

#### Corresponding author:

\*Tel: +861062621607. e-mail: [ybcui@ipe.ac.cn](mailto:ybcui@ipe.ac.cn).

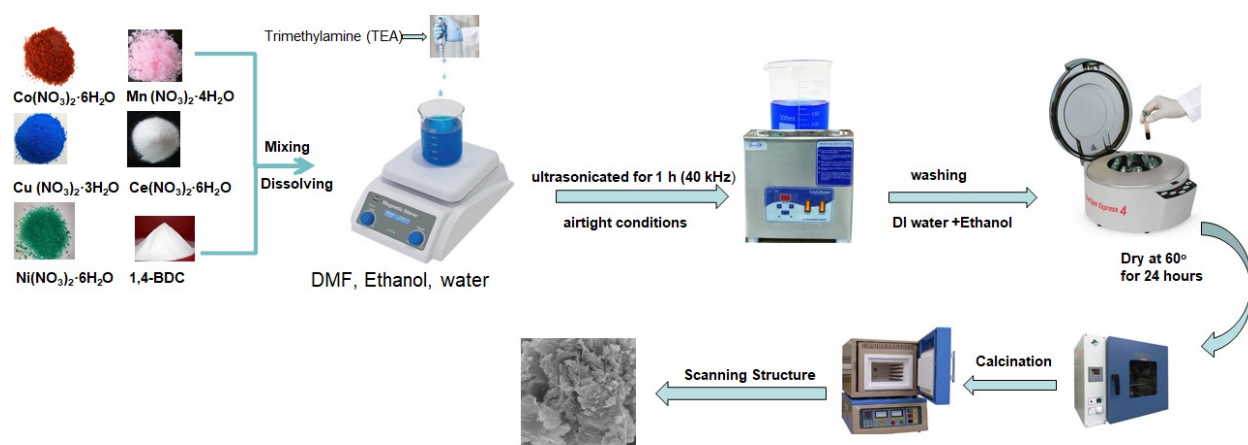

Fig. S1 Scheme for the synthesis of HEO.

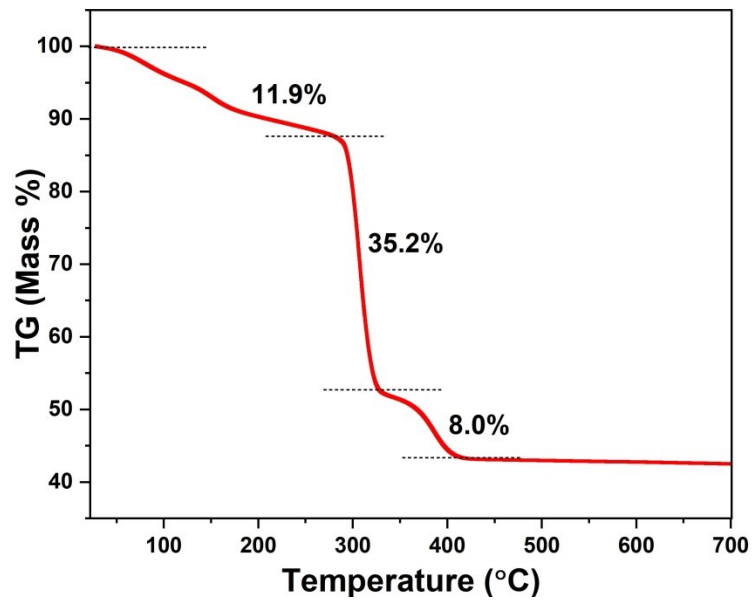

Fig. S2 TGA of HE-MOF before calcination.

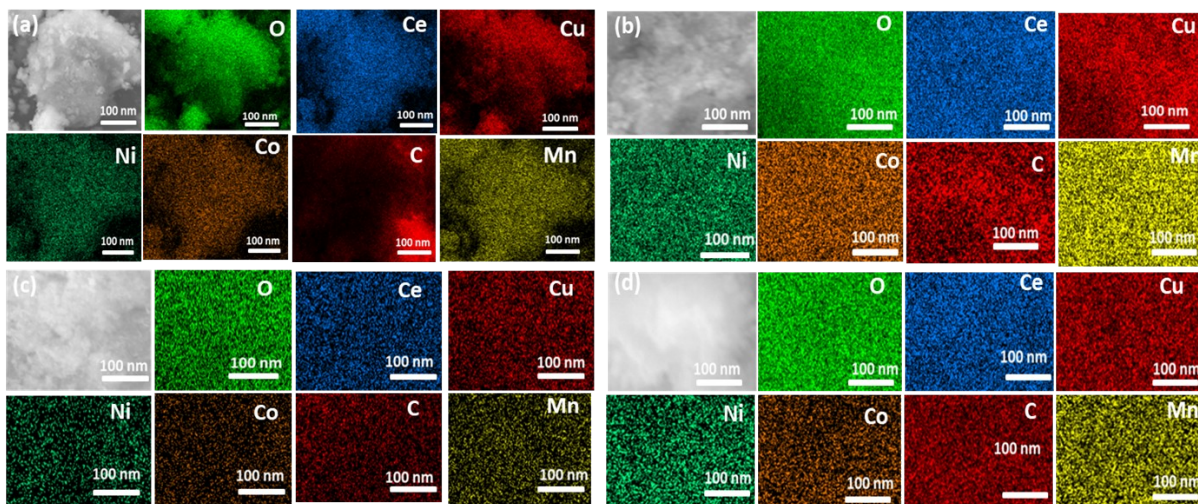

Fig. S3. EDS images of (a) Ce-HEO-300, (b) Ce-HEO-400, (c) Ce-HEO-500 and (d) Ce-HEO-700.

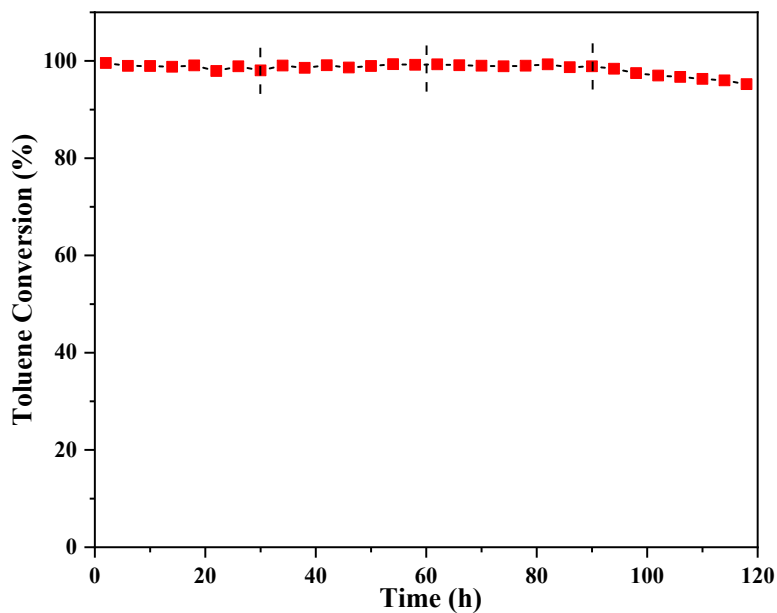

**Fig. S4** Catalytic stability of Ce-HEO-700 for toluene oxidation at 330 °C.

**Table S1** Specific surface area and average pore diameter of the catalysts.

| Sample                                    | Ce-HEO-300 | Ce-HEO-400 | Ce-HEO-500 | Ce-HEO-700 |
|-------------------------------------------|------------|------------|------------|------------|
| Specific surface area (m <sup>2</sup> /g) | 136.18     | 152.96     | 66.33      | 15.83      |
| Average Pore diameter (nm)                | 12.62      | 13.06      | 22.47      | 32.05      |

**Table S2** Comparison of toluene conversion for the catalysts

| Temp (°C)       | Ce-HEO-300 | Ce-HEO-400 | Fe-HEO-400 | La-HEO-400 | Ce-HEO-500 | Ce-HEO-700 |
|-----------------|------------|------------|------------|------------|------------|------------|
| T <sub>50</sub> | 265        | <b>180</b> | 245        | 250        | 225        | 225        |
| T <sub>90</sub> | 300        | <b>255</b> | 280        | 300        | 270        | 270        |

**Table S3** Catalytic oxidation of toluene over different HEO catalysts.

| Catalyst                 | GHSV<br>(h <sup>-1</sup> ) | Toluene<br>(ppm) | T50<br>(°C) | T90<br>(°C) | Ref.         |
|--------------------------|----------------------------|------------------|-------------|-------------|--------------|
| Ce-HEO-500               | 60000                      | 1000             | 283         | 312         | 1            |
| <b>0.5%Au/Ce-HEO-500</b> | <b>60000</b>               | <b>1000</b>      | <b>230</b>  | <b>245</b>  |              |
| HEO-400                  | 60000                      | 800              | 232         | 274         | 2            |
| HEO-500                  | 60000                      | 800              | 239         | 288         |              |
| <b>HEO-600</b>           | <b>60000</b>               | <b>800</b>       | <b>246</b>  | <b>254</b>  |              |
| HEO-700                  | 60000                      | 800              | 300         | 344         |              |
| HEO-800                  | 60000                      | 800              | 407         | 486         |              |
| Ce-HEO-300               | 60000                      | 1000             | 265         | 300         | This<br>work |
| <b>Ce-HEO-400</b>        | <b>60000</b>               | <b>1000</b>      | <b>180</b>  | <b>255</b>  |              |
| Ce-HEO-500               | 60000                      | 1000             | 225         | 270         |              |
| Ce-HEO-700               | 60000                      | 1000             | 225         | 270         |              |
| Fe-HEO-400               | 60000                      | 1000             | 245         | 280         |              |
| HEO-400                  | 60000                      | 1000             | 250         | 300         |              |

**References:**

- 1 J. Zhou, Y. Zheng, G. Zhang, X. Zeng, G. Xu, Y. Cui, Environ. Technol., 2023, **23**, 3016-3028.
- 2 T. Xue, Y. Wang, L. Yang, Z. Li, Y. Gao, Q. Wang, Catalysts., 2023, **13**, 119-131.
